# Supplementary material for: The Characterization of Columnar Apple Gene MdCoL Promoter and Its Response to Abscisic Acid, Brassinosteroid and Gibberellic Acid
Source: Int J Mol Sci. 2022 Sep 15;23(18):10781. doi: 10.3390/ijms231810781 (PMC9505010; doi:10.3390/ijms231810781)
Supplement: Supplementary file 1 [file ijms-23-10781-s001.zip › ijms-1867234-supplementary.pdf]

**Supplementary Table S1. Primer Sequence.**

| Primer Name       | Sequence (5'-3')                         |
|-------------------|------------------------------------------|
| MdCoLp1-F         | <u>GGATCCC</u> CGTCATACTCGCCTTCTCG       |
| MdCoLp2-F         | <u>GGATCCT</u> TGGCCTACTCTCCTAATTGCTA    |
| MdCoLp3-F         | <u>GGATCCCT</u> CAACGGCCACACATGCTC       |
| MdCoLp4-F         | <u>GGATCCG</u> ATTTCGAACTTTGGCCGTAGAG    |
| MdCoLp1-R         | <u>CCATGGAT</u> CAACCTTTGAAACACAAGAGTAAA |
| GUS-F             | TAATGTTCTGCGACGCTCAC                     |
| GUS-R             | ATCGGCGAAATTCCATACCT                     |
| Q.GUS-F           | CGGTCAGTGGCAGTGAAGGG                     |
| Q.GUS-R           | CGAGGTACGGTAGGAGTTGG                     |
| <i>MdActin</i> -F | ATGCCAGGGAACATGGTAGA                     |
| <i>MdActin</i> -R | TGAGCGAGAAATTGTCAGGG                     |
